# Supplementary material for: Low mortality oxidative stress murine chronic wound model
Source: PubMed Central journal article supplement — BMJ Open Diabetes Res Care. 2020 Sep 7;8(1):e001221. doi: 10.1136/bmjdrc-2020-001221 (PMC7478002; doi:10.1136/bmjdrc-2020-001221), 2020-09-07
Supplement: bmjdrc-2020-001221supp001.pdf [file bmjdrc-2020-001221supp001.pdf]

## Supplemental

**Supplemental Table 1** – Mortality in pre-liminary experiments in db/db mice utilizing the Dhall et al. protocol<sup>1</sup>

|                                        | Surgery | Day 1 | Day 2 | Day 3 | Day 4 | Day 5 |
|----------------------------------------|---------|-------|-------|-------|-------|-------|
| <b>Number of animals that survived</b> |         |       |       |       |       |       |
| 11-week-old female                     | 8       | 4     | 1     |       |       |       |
| 11-week-old male                       | 8       | 5     | 3     |       |       |       |
| 8-month-old female                     | 8       | 3     |       |       |       |       |
| 8-month-old male                       | 8       | 4     | 3     | 2     |       | 2     |

**Supplemental Table 2** - Post-surgical timeline follow up numbers

|                                       | Surgery | Day 5 | Day 10 | Day 14 | Day 21 | Day 28 |
|---------------------------------------|---------|-------|--------|--------|--------|--------|
| <b>Number of animals photographed</b> |         |       |        |        |        |        |
| Control                               | 15      | 15    | 13     | 3      | 1      |        |
| Diabetic control                      | 15      | 15    | 13     | 3      | 1      |        |
| Chronic diabetic                      | 16      | 16    | 14     | 4      |        | 2      |
| Treated chronic diabetic              | 16      | 16    | 14     | 4      |        | 2      |
| <b>Number of animals sacrificed</b>   |         |       |        |        |        |        |
| Control                               |         | 2     | 10     | 2      | 1      |        |
| Diabetic control                      |         | 2     | 10     | 2      | 1      |        |
| Chronic diabetic                      |         | 2     | 10     | 2      |        | 2      |
| Treated chronic diabetic              |         | 2     | 10     | 2      |        | 2      |

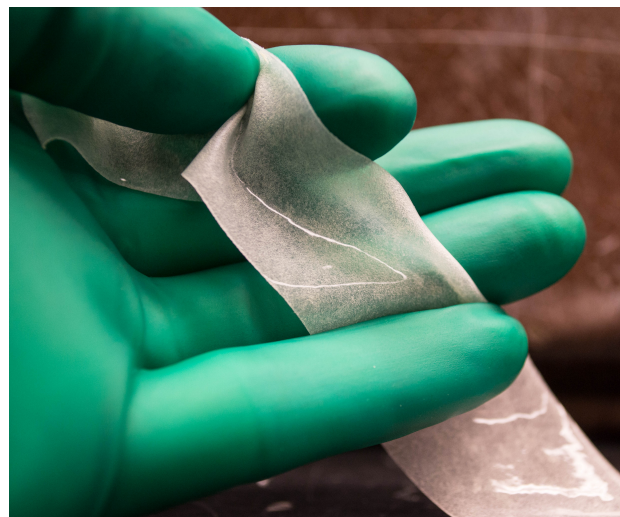

**Supplemental Figure 1. Integra Dermal Regeneration Template.** The scaffold comprises of two layers, an outer layer made of a thin silicone film that acts as an epidermis and an inner layer constructed of a complex matrix of cross-linked fibers that enables re-growth of the dermis.

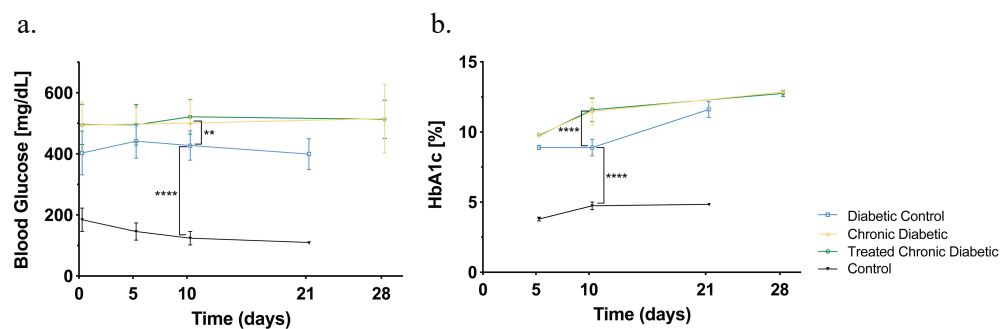

**Supplemental Figure 2. a. Blood Glucose.** The diabetic mice showed higher plasma glucose levels than the non-diabetic Control mice across all days. On day 10 the Diabetic control ( $427 \pm 49\%$ ) had significantly lower glucose levels than both the Chronic Diabetic ( $501 \pm 76\%$ ;  $p=0.007$ ) and Treated Chronic Diabetic ( $521 \pm 57\%$ ;  $p=0.007$ ) mice. No difference in blood glucose was observed between the Chronic Diabetic and the Treated Chronic Diabetic groups. **b. HbA1c.** On Day 10 post-surgery a significant increase in HbA1c was observed in the Diabetic Control ( $8.9 \pm 0.6\%$ ), Chronic Diabetic ( $11.5 \pm 1.0\%$ ), and Treated Chronic Diabetic ( $11.6 \pm 0.8\%$ ), versus the non-diabetic Controls ( $4.7 \pm 0.3\%$ ,  $p<0.0001$  in all cases). A significant difference was also noted between the Chronic Diabetic groups versus the Diabetic Control ( $p<0.0001$ ). No difference in HbA1c was observed between the Chronic Diabetic and the Treated Chronic Diabetic groups.
